# Supplementary material
Source: PubMed Central journal article supplement (PMC3269927)

## Supplementary data

Figure A: In order to test the inhibitory effect of anti-C5a receptor blocking antibody, purified human monocytes ( $10^6$  monocytes/ml) were incubated for 1 hour ( $37^\circ\text{C}$ ) with or without anti-C5a receptor blocking antibody (R&D ;  $1.25\mu\text{g/ml}$ ) and subsequently with C5a (R&D ;  $10\text{nM}$ ) for 10 minutes. Fixation of C5a on monocytes was assessed by flux cytometry using an anti-C5a antibody (Covalab ;  $24\mu\text{g/ml}$ ).

Negative CT, negative control: addition of anti-C5a antibody in the absence of C5a.

MFI, mean fluorescence intensity.

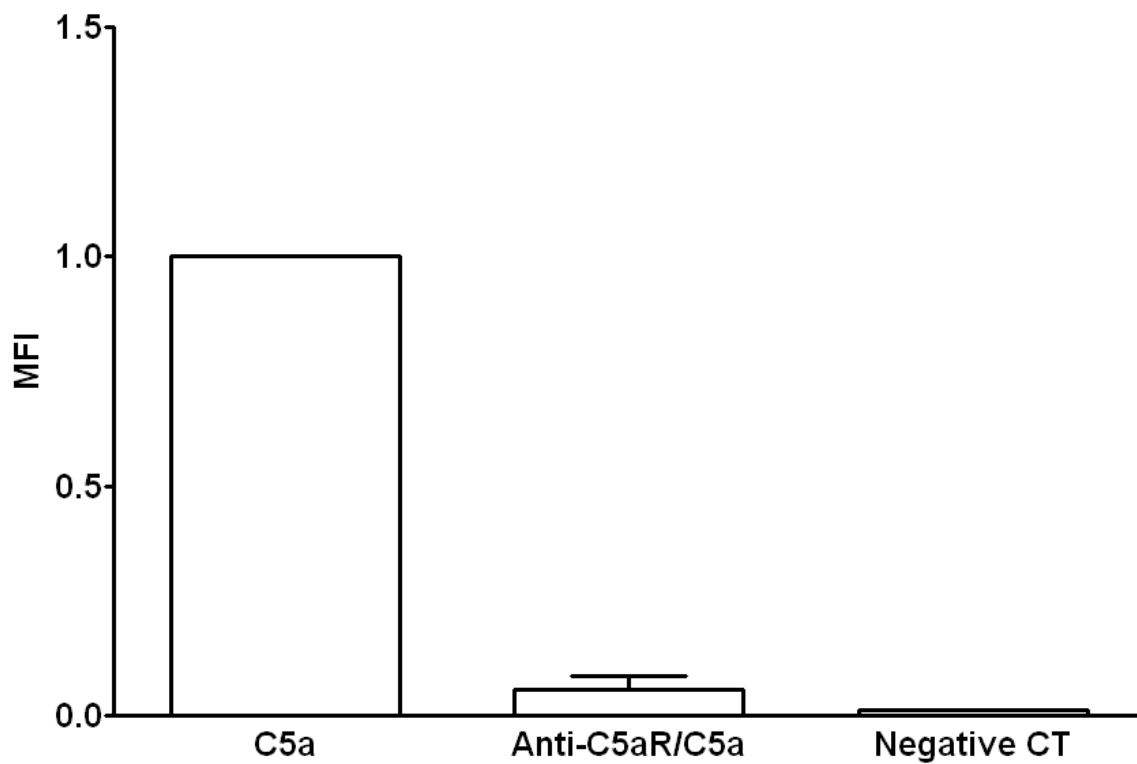

Supplement: ASN.2010080858_ASN2010080858SupplementaryData.pdf [file ASN.2010080858_ASN2010080858SupplementaryData.pdf]
